# Supplementary material for: Complement C4A Regulates Autoreactive B Cells in Murine Lupus
Source: PubMed Central journal article supplement — Cell Rep. Author manuscript; Available in PMC 2021 Mar 3. (PMC7927756; doi:10.1016/j.celrep.2020.108330), 2020-11-03
Supplement: NIHMS1643869-supplement-1.pdf [file NIHMS1643869-supplement-1.pdf]

**Cell Reports, Volume 33**

**Supplemental Information**

**Complement C4A Regulates Autoreactive**

**B Cells in Murine Lupus**

**Léa Simoni, Jessy Presumey, Cees E. van der Poel, Carlos Castrillon, Sarah E. Chang, Paul J. Utz, and Michael C. Carroll**

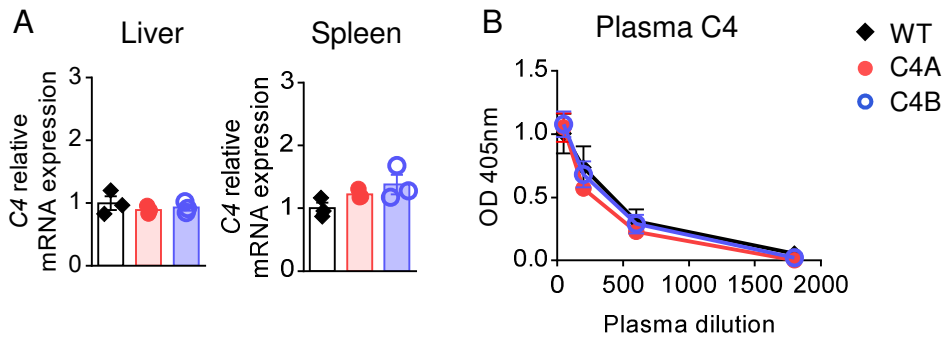

**Figure S1: C4A and C4B strains present physiological levels of C4, Related to Figure 1.**

(A) *C4* mRNA expression quantification by ddPCR. Each sample was normalized to the endogenous control *eif4h* and relative to *C4* expression in WT. Mean  $\pm$  SEM, one dot represents one animal.  $n=3$  for each strain.

(B) C4 protein level measured in plasma from WT, C4A and C4B mice by ELISA. One dot represents the average value  $\pm$  SEM of  $n=4$  for each strain.

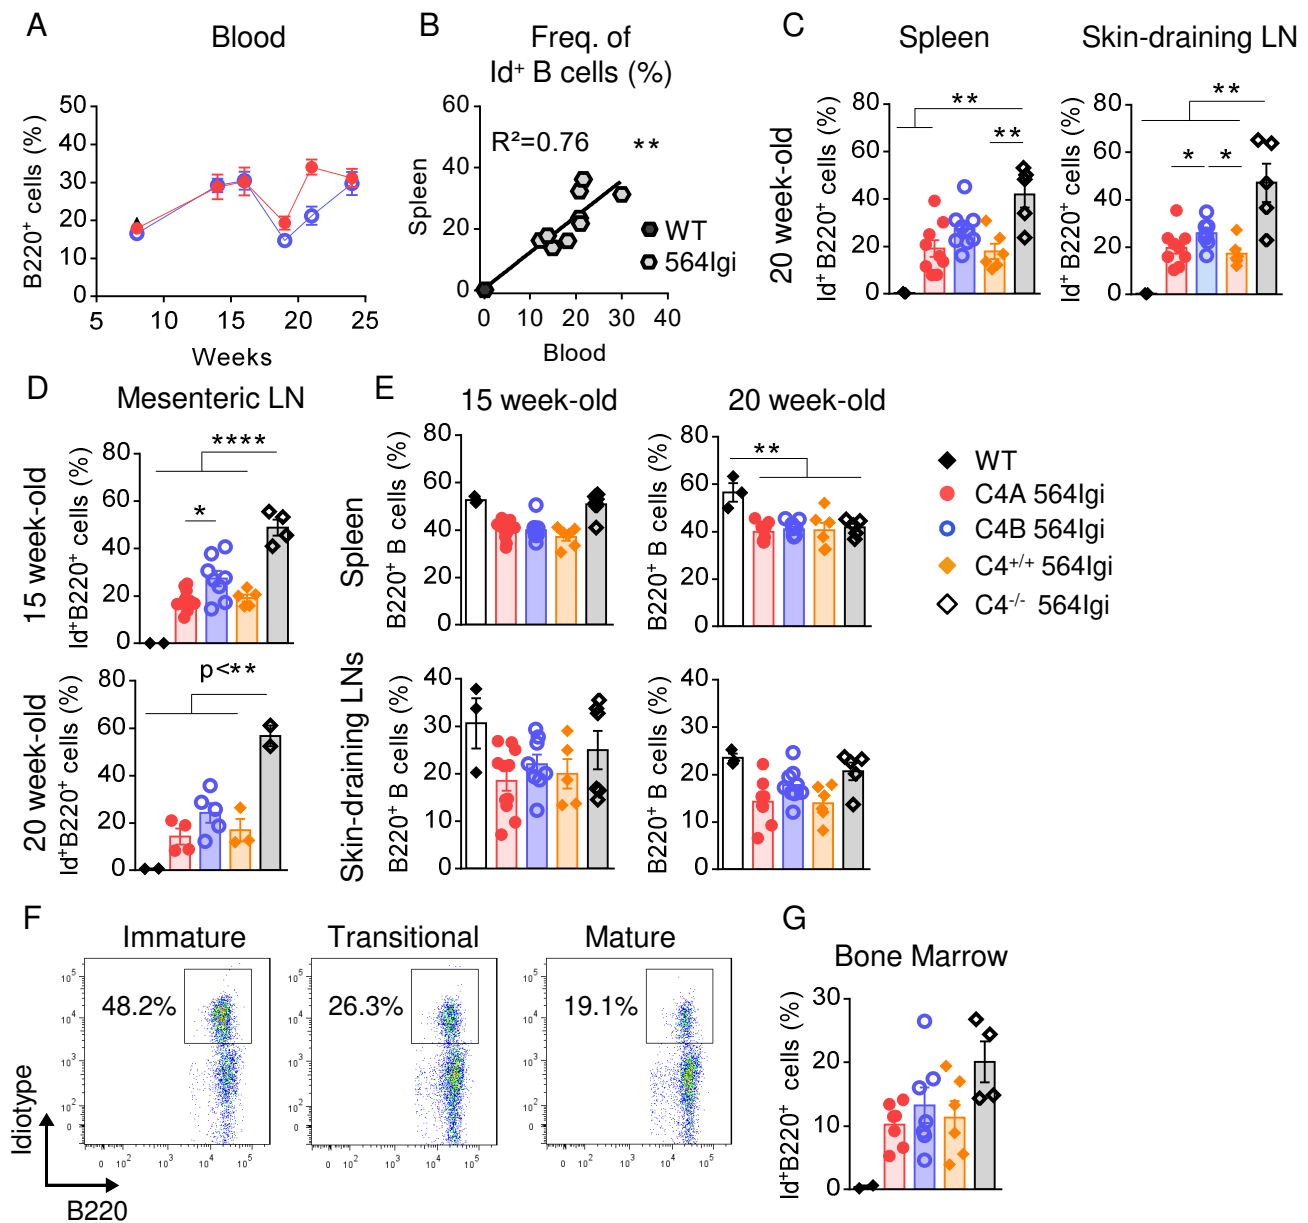

**Figure S2: Analysis of B220<sup>+</sup> B cells and Id<sup>+</sup> B cells at 8, 15 and 20 wo in periphery and in BM, correlation of Id<sup>+</sup> B cells in blood vs spleen, Related to Figure 2.**

(A) Analysis of B220<sup>+</sup> cells percentages in blood circulation by flow cytometry. Mean  $\pm$  SEM, one dot represents the average percentage of n=5 mice for each strain.

(B) Correlation of Id<sup>+</sup> B cells in spleen vs blood by flow cytometry in 564Igi animals. One dot represents one animal, Spearman test, n=9.

(C) Frequency of Id<sup>+</sup> B cell proportions in spleen and skin-draining LN at 20 wo determined by flow cytometry. Mean  $\pm$  SEM, one dot represents one animal, n>5. One-way ANOVA with Tukey's test.

(D) Same as (C) in mesenteric LN at 15 wo and 20 wo, n>4.

(E) Same as (A) in spleen and skin-draining LN at 15 wo and 20 wo, n>5. One-way ANOVA with Tukey's test.

(F) Representative dot plots of Id<sup>+</sup> B220<sup>+</sup> cell population (gated on B220<sup>+</sup> cells) within immature (B220<sup>+</sup> AA4.1<sup>+</sup>), transitional (B220<sup>+</sup> AA4.1<sup>int</sup>) and mature (B220<sup>+</sup> AA4.1<sup>-</sup>) subpopulations of 15 wo 564Igi animals.

(G) Same as (C) in bone marrow at 15 wo, n>4.

(\*<0.05, \*\*<0.01, \*\*\*< 0.001, \*\*\*\*<0.0001)

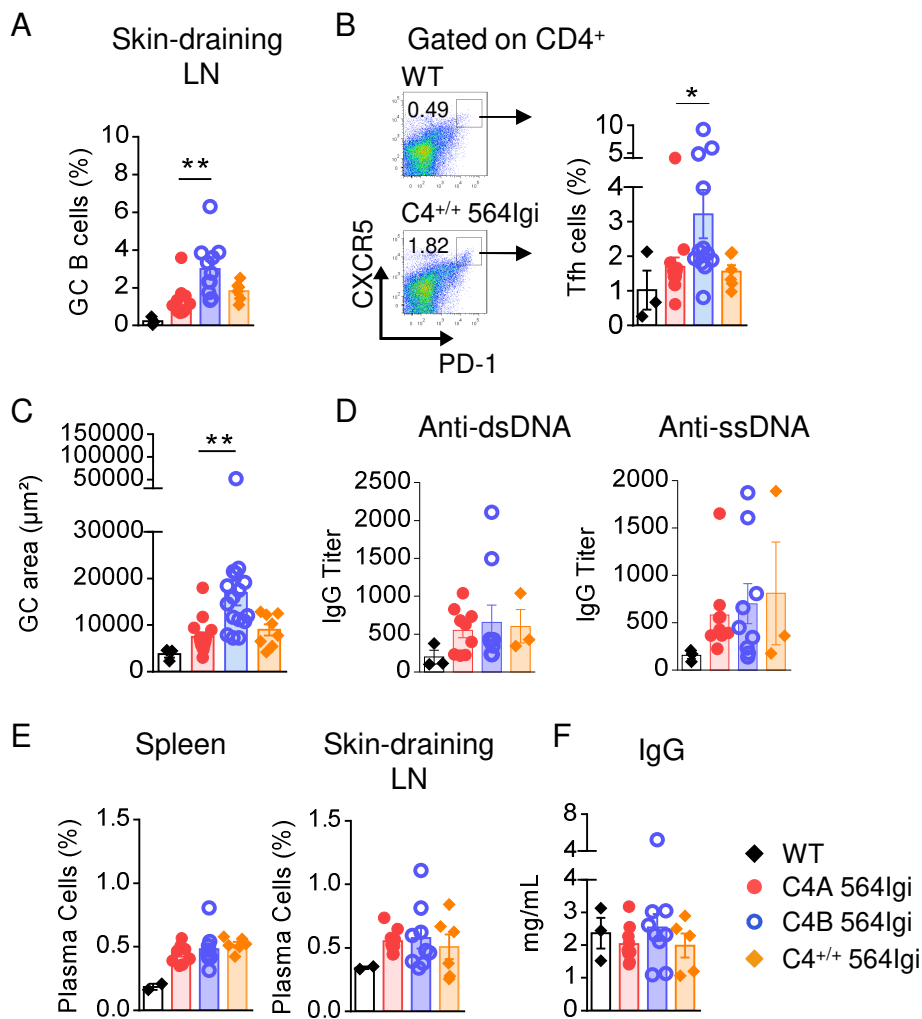

**Figure S3: Analysis of GC and PC, measurement of anti-DNA autoantibody titers and IgG levels, Related to Figure 3.**

(A) GC B cell population (B220<sup>+</sup> CD38<sup>dim/-</sup> GL7<sup>high</sup>) analyzed by flow cytometry in skin-draining LN from 15 wo C4A, C4B and C4<sup>+/+</sup>564Igi. Mean ± SEM, one dot represents one mouse, n>6. One-way ANOVA with Tukey's test.

(B) Splenic Tfh cells (CD4<sup>+</sup> PD-1<sup>high</sup> CXCR5<sup>+</sup>) from 15 wo C4A, C4B and C4<sup>+/+</sup> 564Igi mice, analyzed by flow cytometry. Mean ± SEM, one dot represents one mouse, n>6. One-way ANOVA with Tukey's test.

(C) Splenic GL7<sup>+</sup> area quantification. Spleens were stained for marginal zone macrophages: CD169, B cell zone: B220, T cell zone: CD3 and GC: GL7. Individual GL7<sup>+</sup> areas were measured using ImageJ software. Mean ± SEM, one dot represents the average value obtained for one mouse, n>8. One-way ANOVA with Tukey's test.

(D) Serum anti-dsDNA and -ssDNA IgG titers measured by ELISA. Mean ± SEM, one dot represents one mouse, n>3.

(E) Plasma cells (B220<sup>-</sup> CD138<sup>+</sup>) from 15 wo C4A, C4B and C4<sup>+/+</sup>564Igi mice (spleen (left) and skin-draining LNs (right)) analyzed by flow cytometry. Mean ± SEM, one dot represents one mouse, n>6 .

(F) Serum IgG levels measured by ELISA. Mean ± SEM, one dot represents one mouse, n>5.

(\*<0.05, \*\*<0.01)

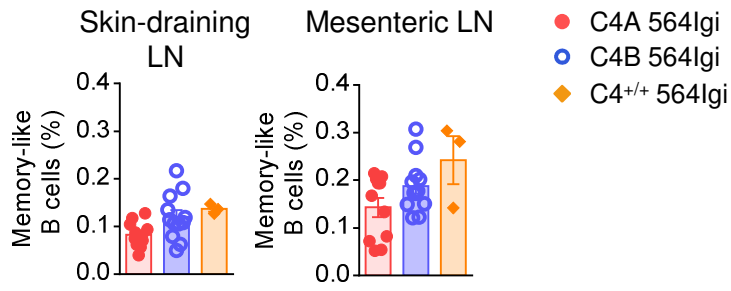

**Figure S4: Analysis of autoreactive memory-like B cells, Related to Figure 4.**

Analysis of autoreactive memory-like B cell population (B220<sup>+</sup> YFP<sup>+</sup> CD138<sup>-</sup> GL7<sup>-</sup>) at 15 wo by flow cytometry. Mean ± SEM, one dot represents one mouse, n>3.

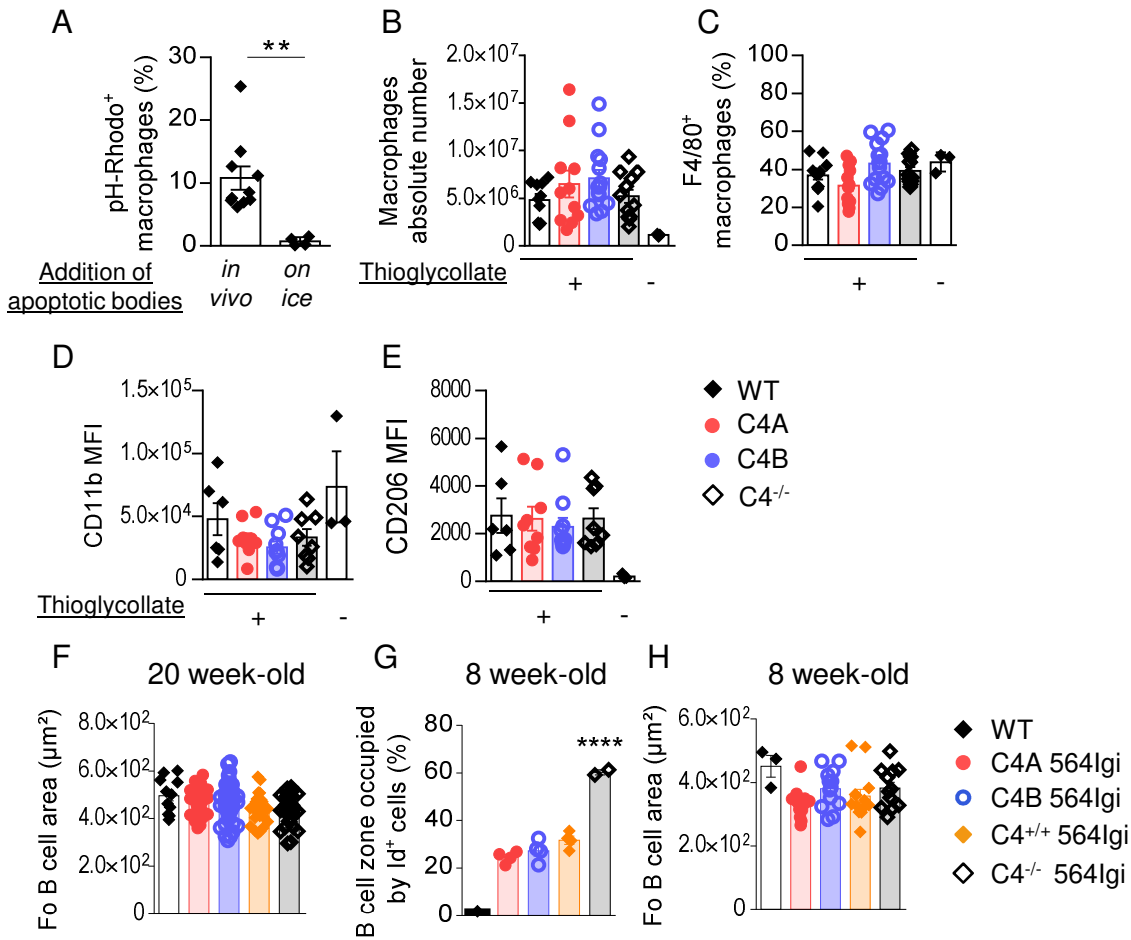

**Figure S5: Elicited peritoneal macrophages phenotype and follicular exclusion of Id<sup>+</sup> B cells analysis, Related to Figure 5.**

(A) Assessment of phagocytosis activity on ice. Macrophages were incubated on ice for 3 hours (time needed to perform the experiment) with apoptotic cells and then analyzed for apoptotic cell uptake. Mean  $\pm$  SEM, one dot represents one mouse,  $n > 4$ . Mann and Whitney test,  $** < 0.005$ .

(B-E) Characterization of elicited macrophages. The absolute numbers of F4/80<sup>+</sup> peritoneal macrophages (B), their frequency (C), and the expression of CD11b (D) and CD206 (E) at the surface were analyzed by flow cytometry. Mean  $\pm$  SEM, one dot represents one mouse,  $n > 10$ .

(F) Follicular B cell zone area analyzed per field of view of splenic sections from 20 wo mice. Mean  $\pm$  SEM, each dot represents one field of view,  $n > 31$  per strain.

(G-H) Analysis of Id<sup>+</sup> B cell follicular exclusion at 8 wo using cell profiler software. (G) Quantification of follicular exclusion expressed as % of follicular B cell zone occupied by Id<sup>+</sup> B cells. Mean  $\pm$  SEM, each dot represents one mouse,  $n = 4$  for all groups except  $n = 2$  for C4<sup>-/-</sup> 564lgi. One-way ANOVA with Tukey's test,  $**** < 0.001$ ; (H) Follicular B cell zone area analyzed per field of view of splenic sections from 8 wo mice. Mean  $\pm$  SEM, each dot represents one field of view,  $n > 12$ .

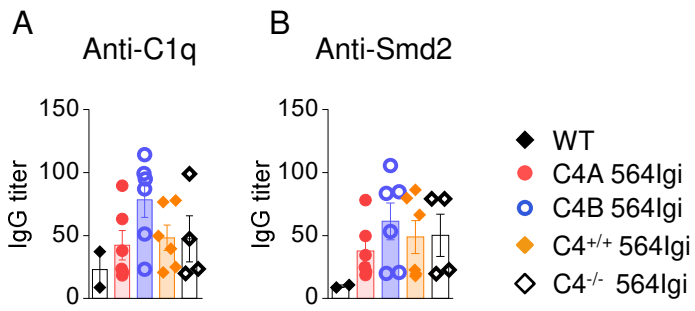

**Figure S6: Measurement of anti-C1q and anti-Smd2 IgG titers, Related to Figure 6.**

(A-B) Dosage of anti-C1q and anti-Smd2 IgG titers in serum of 15-20 wo C4<sup>-/-</sup>, C4A, C4B and C4<sup>+/+</sup> 564Igi by ELISA. Mean  $\pm$  SEM, one dot represents one mouse, n>4. One-way ANOVA with Tukey's test.

**Table S1. Cas9 DNA templates used to generate C4A and C4B gene-edited strains, Related to STAR Methods.**

| Cas9 DNA template |                                                                                                                                                                                                           |
|-------------------|-----------------------------------------------------------------------------------------------------------------------------------------------------------------------------------------------------------|
| C4A               | ccaggaacagggtgggcaactccccggagaagctgcaggagacggctagctggctgctggcccagcagctgggtgatggctccttcaggatccctgtccagtgtagacaggagcatgc<br>agggtgtaacacgctggaggcacgtgtaggatgtcagcaggaagacgggctcctcacaactctggcctgacagcctctt |
| C4B               | gagaagctgcaggagacggctagctggctgctggcccagcagctgggtgatggctccttcaggacctctctccggtgatacataggagcatgcaggtgtgaacacgctggaggcacgt<br>gtaggatgtcagcaggaagacgg gctcctca                                                |



**Table S2. Primer sequences and reaction conditions used for PCR genotyping, Related to STAR Methods.**

| Trans-genes     | Primers (IDT)  | Sequences (5'-3')                | Amplification program |                                         |           |           | Fragment size (bp) |                                 |
|-----------------|----------------|----------------------------------|-----------------------|-----------------------------------------|-----------|-----------|--------------------|---------------------------------|
|                 |                |                                  | I. 94°C               | II. Cycles                              |           | III. 72°C |                    | IV. 8°C                         |
|                 |                |                                  |                       | Description                             | Number    |           |                    |                                 |
| 564 Light Chain | 564k           | CCAGTGCAGATTTTCAGCTTC            | 4 min                 | 94°C 1min<br>55°C 1min<br>72°C 1min     | 40 cycles | 5 min     | ∞                  | 724 bp                          |
|                 | Jk5            | CAGCTTGGTCCCAGCACCGAA            |                       |                                         |           |           |                    |                                 |
| 564 Heavy Chain | VH4emu         | CACAGATTCTTAGTTTTTCAA            | 4 min                 | 94°C 1min<br>50°C 1min<br>72°C 1min     | 40 cycles | 5 min     |                    | 542 bp                          |
|                 | VH564          | TGGAGCTATATCATCCTCTTT            |                       |                                         |           |           |                    |                                 |
| C4 KO           | C4 23F         | ATAACTGGGTCCGACTTTGG             | 4 min                 | 94°C 1min<br>56°C 1min<br>72°C 1min     | 30 cycles | 10 min    |                    | Mutant:<br>800 bp<br>WT: 600 bp |
|                 | C4 25R         | TCTTCCGAAACTGCTGGATCC            |                       |                                         |           |           |                    |                                 |
|                 | C4 29R         | TACCTGGGTACTGCGGAATGC            |                       |                                         |           |           |                    |                                 |
|                 | Neo4483        | AAGCCGGTCTTGTCGATCAG             |                       |                                         |           |           |                    |                                 |
| C4Crispr_P CR1  | 3' mC4 ex22-28 | GTCGACCAAGTCCCAGGTGCTCTGC<br>C   | 2 min                 | 95°C 30sec<br>65°C 30sec<br>72°C 1min30 | 35 cycles | 5 min     |                    | N/A                             |
|                 | 5' mC4 ex22-28 | GTCGACCTGGCCTTGAACTTCAGTA<br>ATC |                       |                                         |           |           |                    |                                 |
| C4Crispr_P CR2  | C4BF1          | TCACCTGAAGTCCATGGACCCTG          | 2 min                 | 95°C 30sec<br>65°C 30sec<br>72°C 2min   | 35 cycles | 5 min     | 978 bp             |                                 |
|                 | C4BR1          | CATCGTATCCTGGAAGACGTCCAA         |                       |                                         |           |           |                    |                                 |

**Table S3. Post-PCR digestion conditions to genotype C4A and C4B mouse strains, Related to STAR Methods.**

| Transgenes | Fragment size before digestion | Restriction enzyme | Digestion conditions | Fragment size after digestion               |
|------------|--------------------------------|--------------------|----------------------|---------------------------------------------|
| C4A        | 978 bp                         | BamHI              | 2 hours – 37°C       | WT: 515 + 463 bp<br>Mut: 293 + 222 + 463 bp |
| C4B        | 978 bp                         | BsAWI              | 2 hours – 60°C       | WT: 978bp<br>Mut: 765 + 213 bp              |

**Table S4. Primer sequences and reaction conditions used to measure *C4* mRNA expression by ddPCR, Related to STAR Methods.**

| Transgenes   | Primers | Sequences (5'-3')    | Amplification program |                                     |           |           |         |
|--------------|---------|----------------------|-----------------------|-------------------------------------|-----------|-----------|---------|
|              |         |                      | I. 94°C               | II. Cycles                          |           | III. 72°C | IV. 8°C |
|              |         |                      |                       | Description                         | Number    |           |         |
| <i>C4</i>    | Forward | AGCGTGTTTCCAGCTCAAAG | 4 min                 | 94°C 1min<br>55°C 1min<br>72°C 1min | 40 cycles | 5 min     | ∞       |
|              | Reverse | GTCCTAAGGCCTCACACCTG |                       |                                     |           |           |         |
| <i>eif4h</i> | Forward | TGCAGCTTGCTTGGTAGC   |                       | 94°C 1min<br>50°C 1min<br>72°C 1min |           |           |         |
|              | Reverse | GTAATTGCCGAGACCTTGC  |                       |                                     |           |           |         |

**Table S5. ELISA conditions, Related to STAR Methods.**

| Measurement              | Coating conditions                                                | Sample dilutions in PBS-T 0.1% | Standard                                                           | Detection                                                                               |
|--------------------------|-------------------------------------------------------------------|--------------------------------|--------------------------------------------------------------------|-----------------------------------------------------------------------------------------|
| C4 level                 | 1.5µg/mL rat anti-mouse C4 (gift of E. Kremmer, Munich, Germany)  | 1/50 to 1/5000                 | N/A                                                                | 4µg/mL of rabbit anti-human C4c (Dako) + goat anti-Rabbit-AP (Southern biotech, 1/1000) |
| IgG level                | 1.5µg/mL goat anti-mouse IgG (southern Biotech)                   | 1/500 to 1/250 000             | Mouse IgG (sigma) from 1000ng/mL to 1.9ng/mL                       | Goat anti-mouse IgG-AP (Southern biotech, 1/1000)                                       |
| IgG2a level              | 1.5µg/mL goat anti-mouse IgG 2a (southern Biotech)                | 1/500 to 1/250 000             | Purified mouse IgG2a (southern biotech) from 1000ng/mL to 1.9ng/mL | Goat anti-mouse IgG2a-AP (Southern biotech, 1/1000)                                     |
| Anti-nucleoli IgG titers | 100µL of purified nucleoli per 96-well plate, spun 10min at 1300g | 1/25 to 1/200                  | N/A                                                                | Goat anti-mouse IgG-AP (Southern biotech, 1/10000)                                      |
| Anti-Ro60 IgG titers     | 1.5µg/mL Ro60 protein (Diarect)                                   | 1/20 to 1/1280                 | N/A                                                                | Goat anti-mouse IgG-HRP (Southern biotech, 1/10000)                                     |
| Anti-BPI IgG titers      | 1.5µg/mL BPI protein (Diarect)                                    |                                |                                                                    |                                                                                         |
| Anti-CTGF IgG titers     | 1.5µg/mL CTGF protein (R&D system)                                |                                |                                                                    |                                                                                         |
| Anti-Smd2 IgG titers     | 1µg/mL Smd2 protein (Diarect)                                     |                                |                                                                    |                                                                                         |
| Anti-C1q IgG titers      | 1µg/mL C1q protein (Meridian Life Science)                        |                                |                                                                    |                                                                                         |
| Anti-APRIL IgG titers    | 1.5µg/mL APRIL protein (PEPROTECH)                                |                                |                                                                    |                                                                                         |

---

## Antigens

---

Human IgG from serum  
Anti-Human IgG Fc fragment Specific  
Anti-Human IgG (H+L)  
Anti-Human IgG F(ab') fragment specific  
La/SSB  
Ro 52/SSA  
CENP B  
EBV EBNA-1  
EGFR  
FBL (Fibrillarin/U3RNP)  
Hepatitis B Surface Antigen HBSAg  
U11/U12  
Ku, p70/p80  
Nucleolin  
PDC-E2  
PM/Scl 100  
POLR3H  
Pyruvate dehydrogenase (PDH)  
Ro 60/SSA (bovine)  
Ro 60/SSA (recombinant)  
RPP14 (Th/To)  
Scl-70, full-length  
Scl-70, truncated  
Sm/RNP (SRC-3000)  
Smith (SMA-3000)  
ssDNA  
TG  
TPO (Thyropoxidase)  
U1-snRNP 68  
U1-snRNP A  
U1-snRNP C  
RPP25 (Th/To)  
MDC  
TNF-B  
GBM  
APRIL  
CTGF  
IFN-g  
IL17-A  
Catalase  
SSA/Ro60  
BPI  
Smd2  
TPO  
OVA  
C1q

---

**Table S6. List of self-antigens and controls tested to measure sera autoreactivity,** Related to Figure 6 and STAR Methods.
